# Supplementary material
Source: MDPI journal article supplement (https://www.mdpi.com/2571-6131/1/1/16)
Supplement: s1 [file s1]

**SF 1** Misidentification of C12A7 (orange) as C5A3 (blue) has led to the notion that C5A3 + C3A are the formation pathways to calcium aluminate compounds [2,3]. Depending on reactant heterogeneity C12A7 + C3A or CA + C3A are the formation pathways based on the referenced thermodynamic experimental studies with correct phase identification. In our kinetic study C3A + CA was the formation pathway with high and low reactant heterogeneity, and direct formation of C12A7 is the formation pathways with atomic homogeneity.

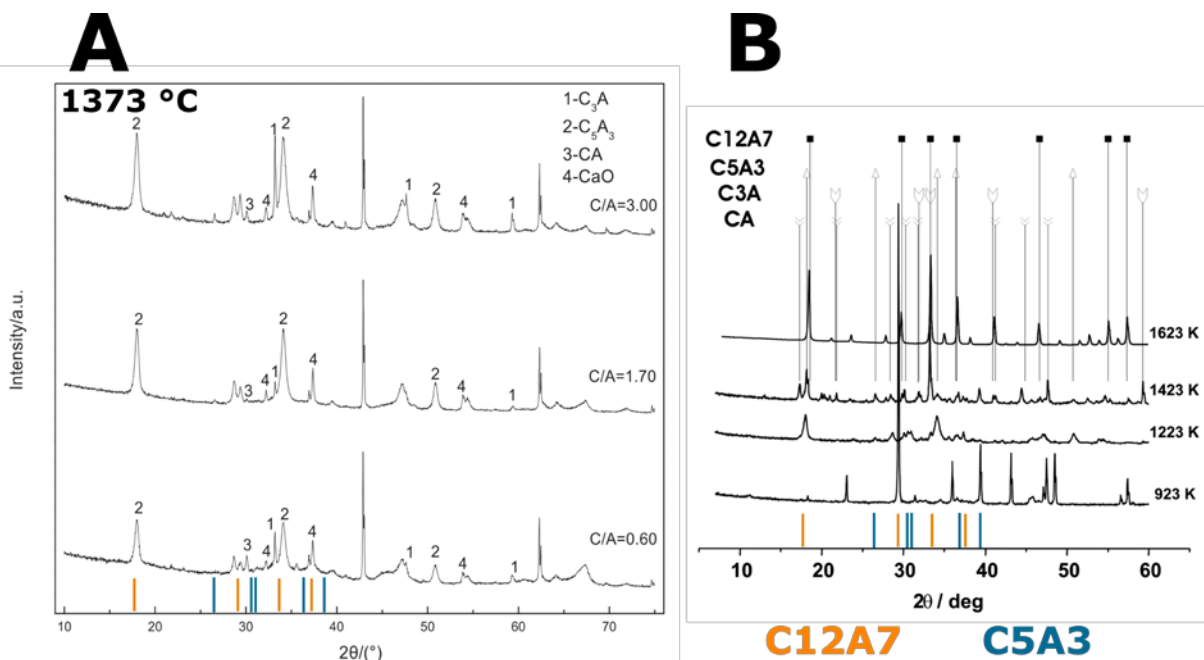

**Supplementary Information Table 1** HTXRD  
instrumental and data collection parameters

| <b>Instrument Parameters</b> |                                      |
|------------------------------|--------------------------------------|
| <b>Instrument</b>            | PANalytical Empyrean                 |
| <b>Source</b>                | Cu $K\alpha_1/K\alpha_2$             |
| <b>Stage</b>                 | Anton Parr HTK 1200N                 |
| <b>Detector</b>              | PIXcel3D-Medipix3 1x1 detector       |
| Mode                         | Scanning Line Detector               |
| Active channels              | 255 (3.3482 °2 $\theta$ )            |
| <b>Collimation</b>           |                                      |
| <b>Incident</b>              |                                      |
| Divergence Slit [°]          | 1/4                                  |
| Soller slit [rad]            | 0.04                                 |
| Anti-scatter slit [°]        | 1/2                                  |
| Mask [mm]                    | 10                                   |
| <b>Diffacted</b>             |                                      |
| Anti-scatter slit [mm]       | 5                                    |
| Soller Slit [rad]            | 0.04                                 |
| <b>Scan Parameters</b>       |                                      |
| Step Size [°2 $\theta$ ]     | 0.0131                               |
| Step Time [s]                | 13.7                                 |
| Scan Time [s]                | 90/150*                              |
| Scan Range [°2 $\theta$ ]    | 27.5 - 37                            |
| Temperatures                 | Dynamically<br>(RT to 1100/1200 °C)* |

\* PVA/SSS respectively
